# Supplementary material for: A human tau seeded neuronal cell model recapitulates molecular responses associated with Alzheimer’s disease
Source: PubMed Central journal article supplement (PMC8854741; doi:10.1038/s41598-022-06411-4), 2022-02-17

## **Supplementary Information**

Supplementary figure S1. qRT-PCR to validate RNA sequencing analysis. A set of genes whose expression was either continually increased (a) or decreased (b) by RNA-Seq were chosen for qRT-PCR validation. Panel (c) and (d) show qRT-PCR results of the 8 genes and data were plotted for each time point as  $\text{Log}_2$  of seeded condition expression / unseeded control.

Supplementary figure S2. Gene expression heatmap of 1075 significantly differentially expressed genes in the control and seeded groups at DIV3, DIV7 and DIV14.

Supplementary figure 1.

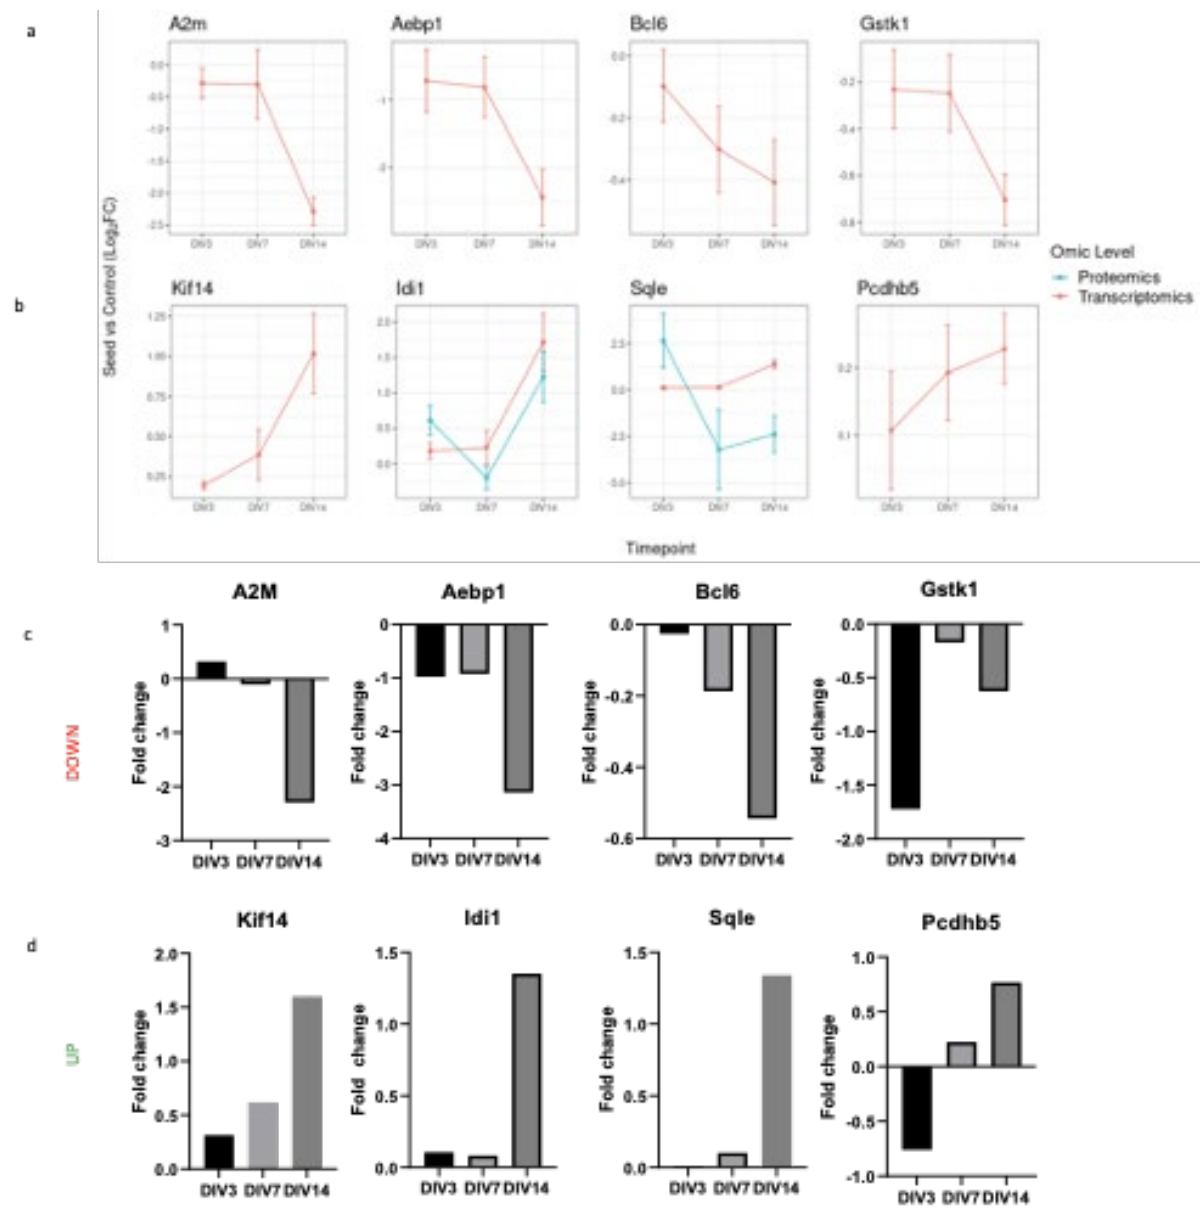

Supplementary figure 2.

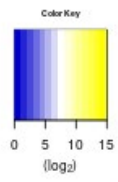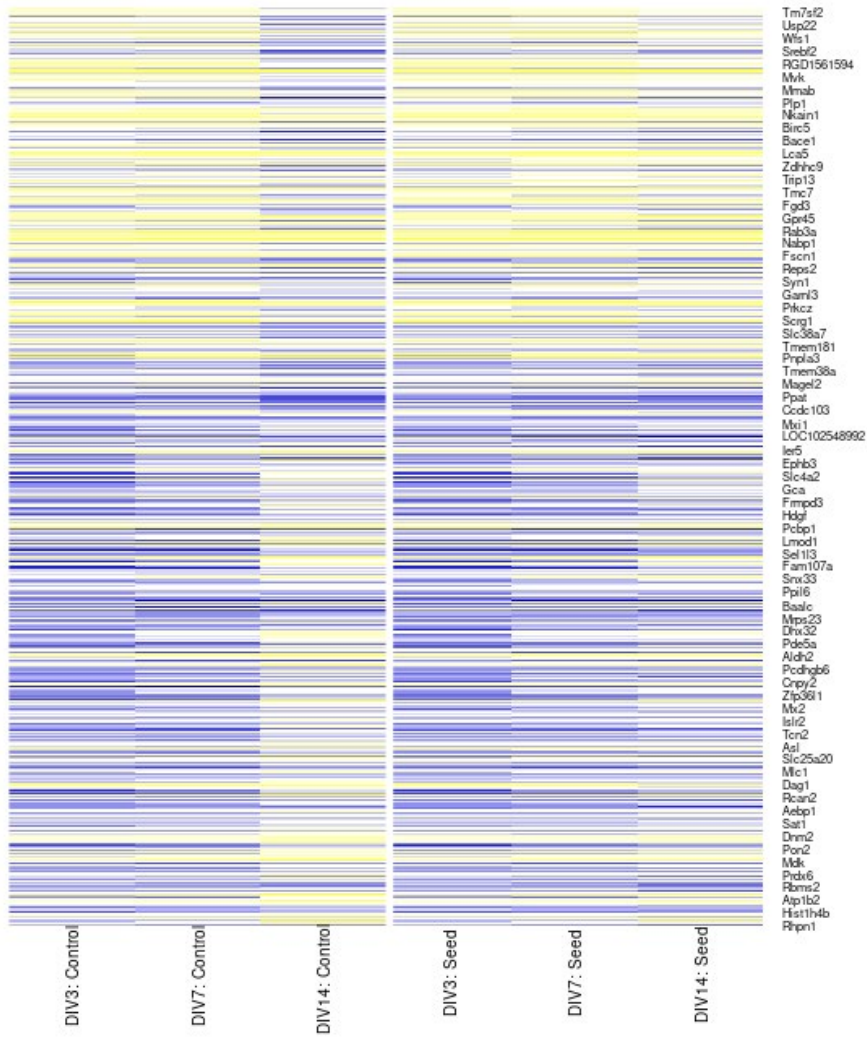

Supplement: 41598_2022_6411_MOESM7_ESM.pdf [file 41598_2022_6411_MOESM7_ESM.pdf]
